# Supplementary material
Source: MDPI journal article supplement (https://www.mdpi.com/2079-6412/8/8/289)
Supplement: s1 [file s1]

## Supplementary Materials

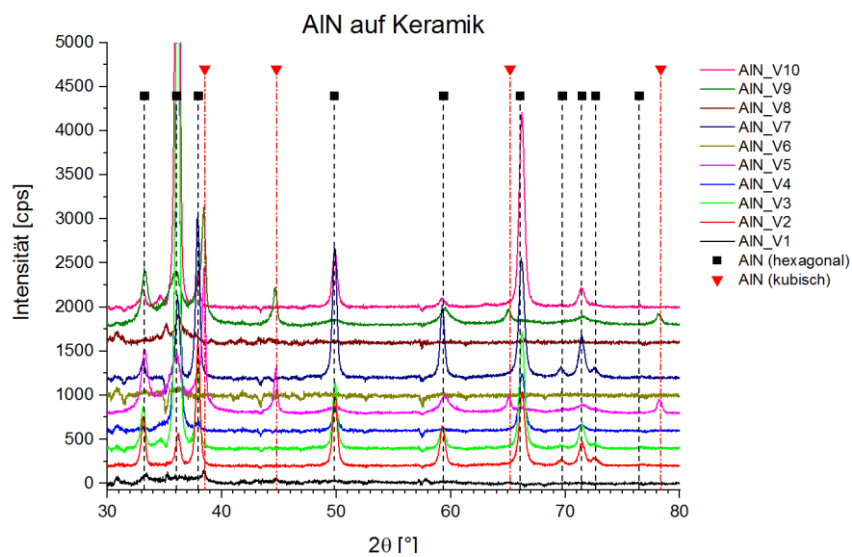

**Figure S1.** XRD patterns of all samples, sputtered on ceramic.

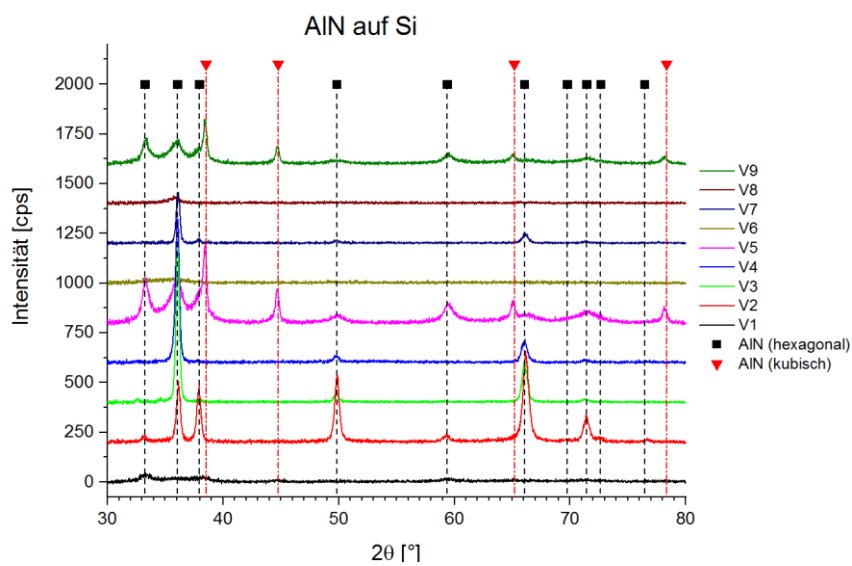

**Figure S2.** XRD patterns of all samples, sputtered on silicon.

## AlN auf Keramik

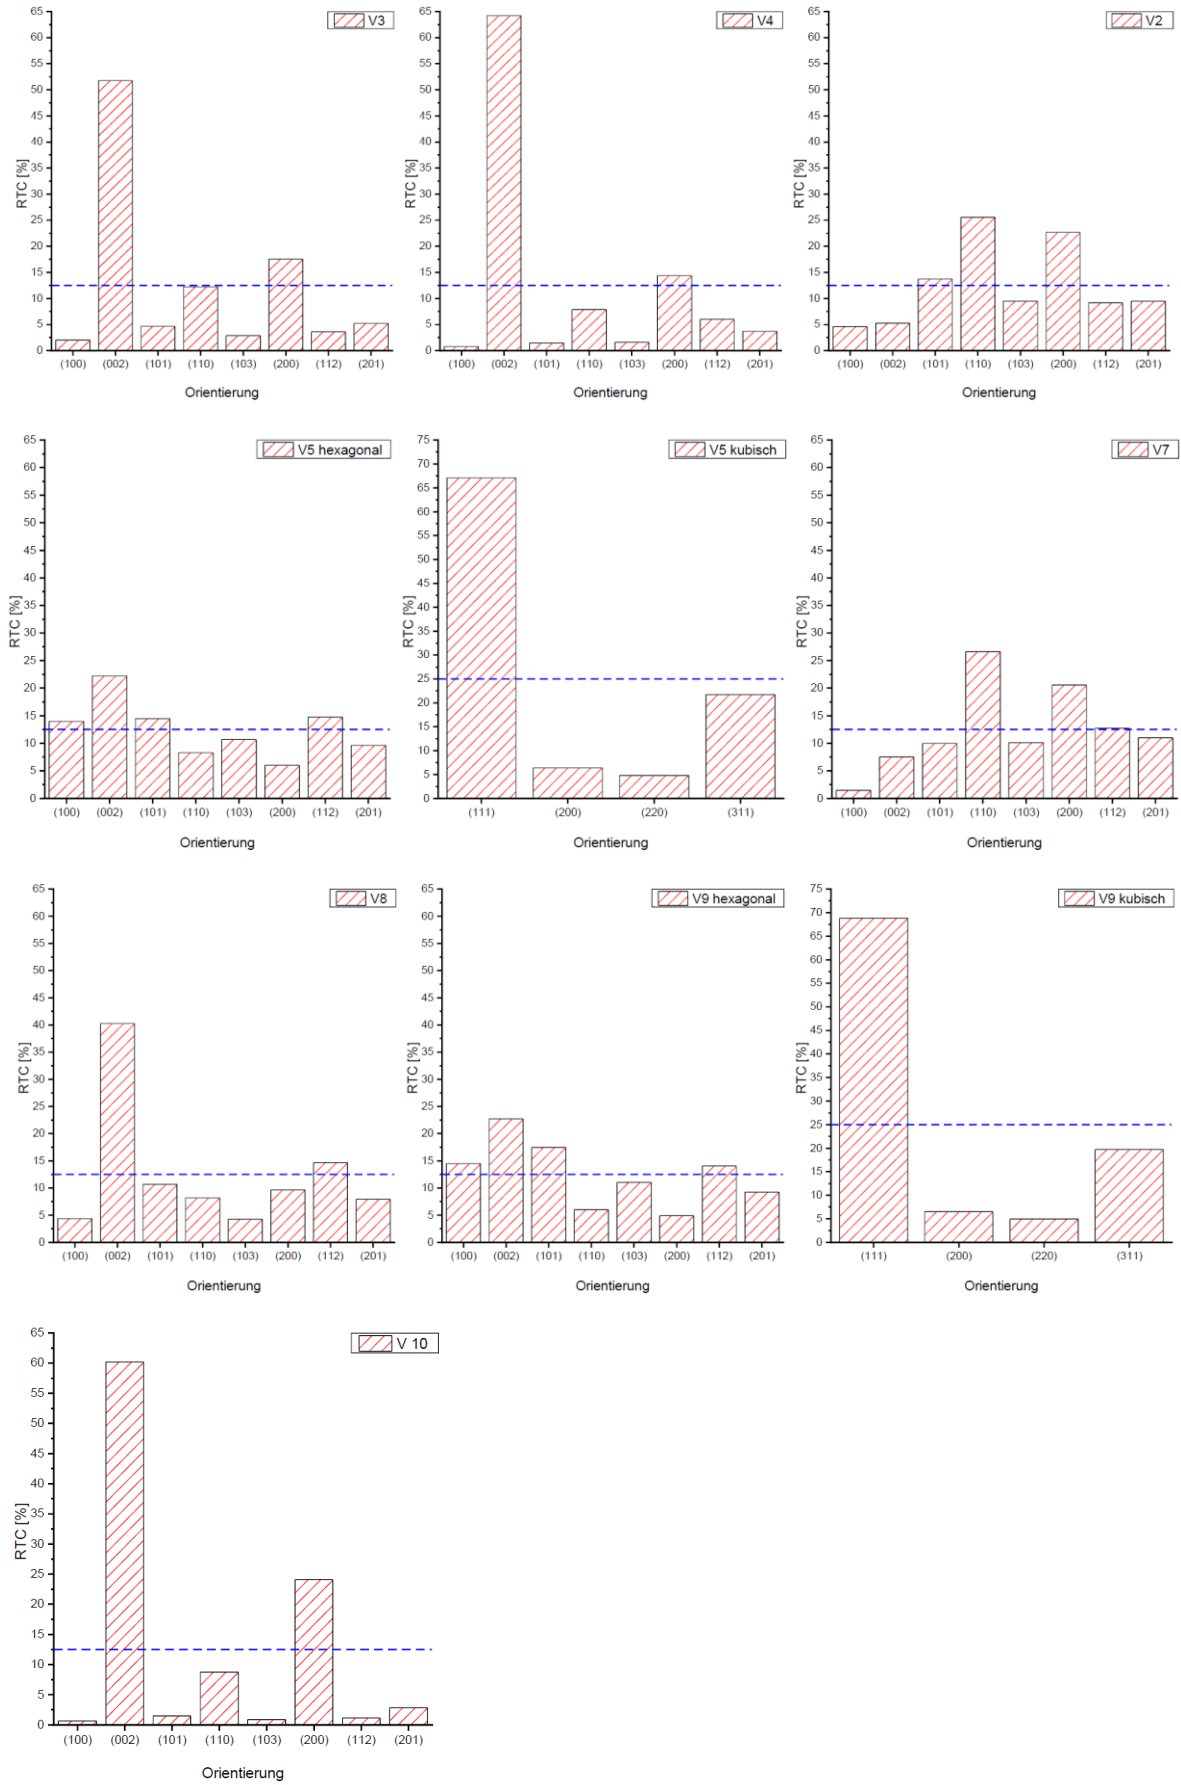

Figure S3. RTC calculations for all experiments, samples prepared on ceramics.

## AlN auf Si

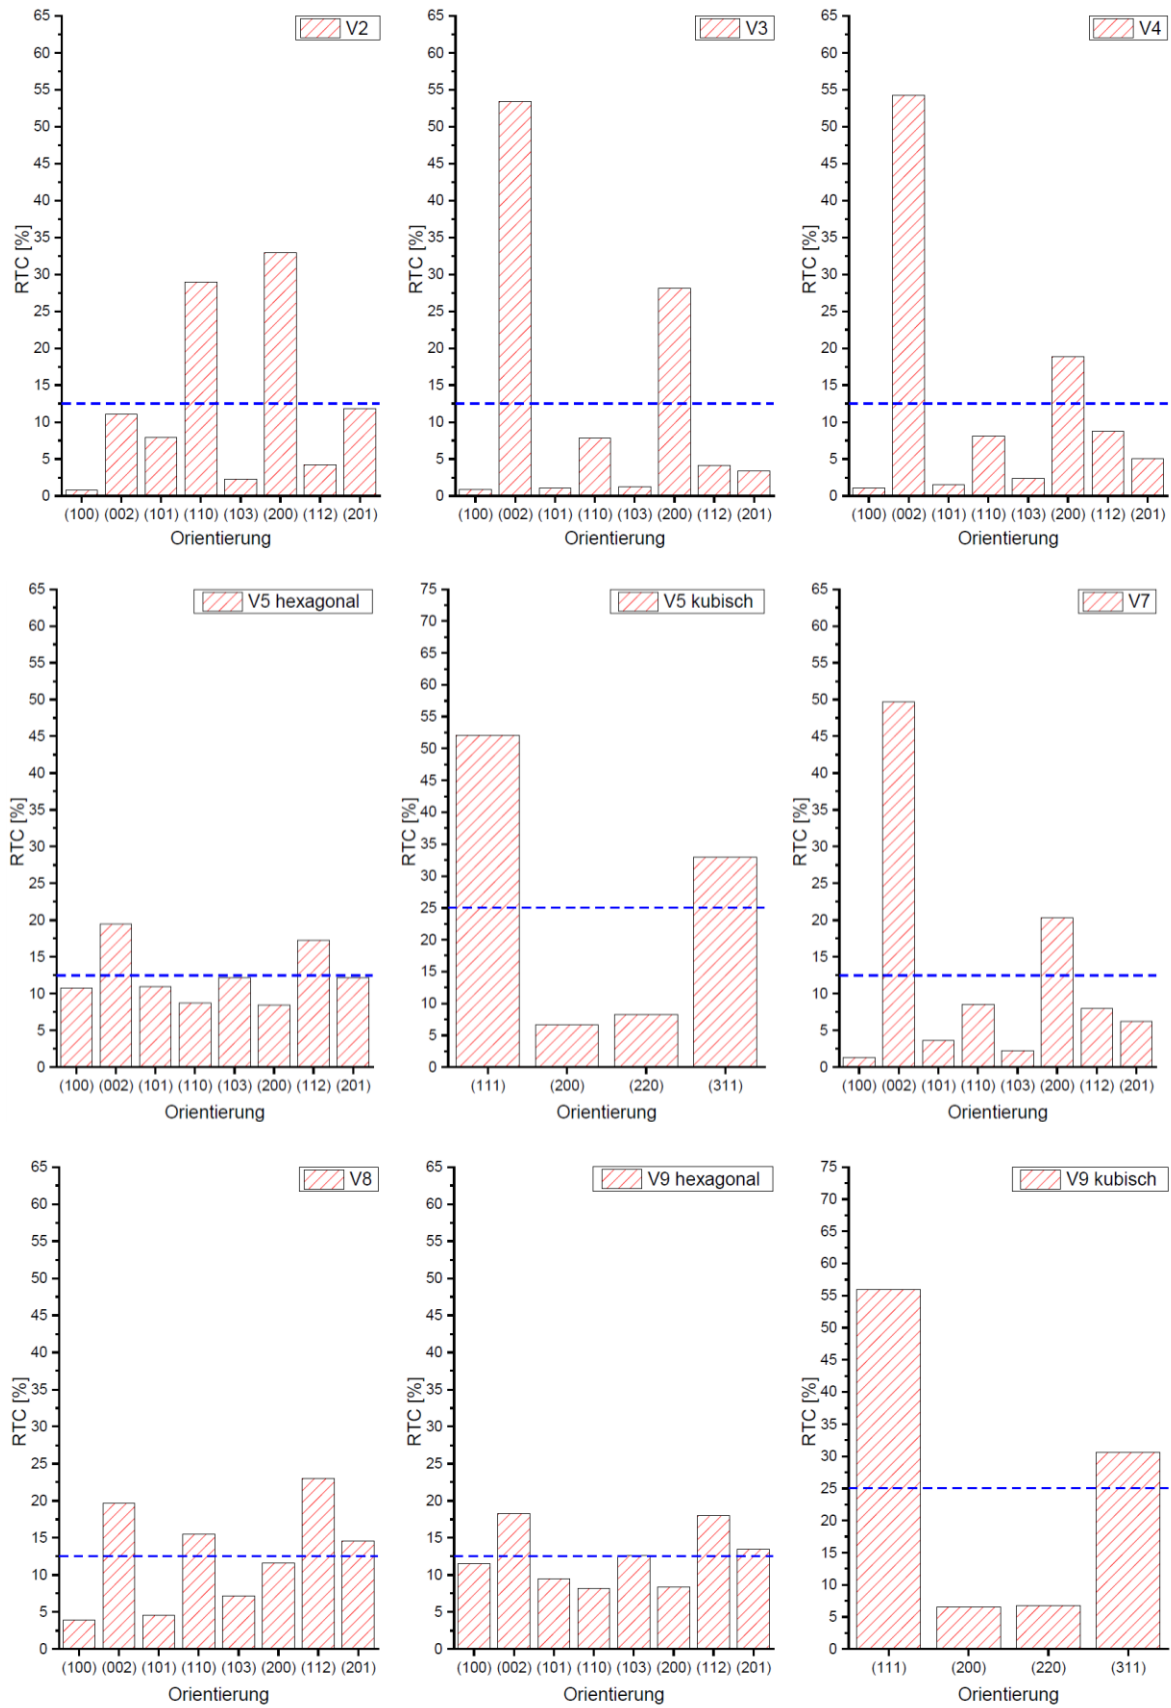

Figure S4. RTC calculations for all experiments, samples prepared on silicon.
